# Supplementary material for: Statistical-based database fingerprint: chemical space dependent representation of compound databases
Source: PubMed Central journal article supplement (PMC6755589; doi:10.1186/s13321-018-0311-x), 2018-11-22
Supplement: 13321_2018_311_MOESM1_ESM.pdf [file 13321_2018_311_MOESM1_ESM.pdf]

## Supporting Information

### Statistical-Based Database Fingerprint: Chemical space dependent representation of compound databases

Norberto Sánchez-Cruz, José L. Medina-Franco

| Contents         | Page                                                                                                                           |
|------------------|--------------------------------------------------------------------------------------------------------------------------------|
| <b>Table S1</b>  | Average similarity searching performances for SB-DFP constructed at different confidence levels. S2                            |
| <b>Table S2</b>  | “1” bits count for 15,403,690 compounds taken from ZINC using MACCS keys. S3                                                   |
| <b>Table S3</b>  | “1” bits count for 15,403,690 compounds taken from ZINC using ECFP4. S4                                                        |
| <b>Table S4</b>  | Similarity matrix of compound data sets computed as the median Tanimoto coefficient between its compounds using MACCS keys. S6 |
| <b>Table S5</b>  | Similarity matrix of compound data sets computed as Tanimoto coefficient between its DFP based on MACCS keys. S7               |
| <b>Table S6</b>  | Similarity matrix of compound data sets computed as Tanimoto coefficient between its SB-DFP based on MACCS keys. S8            |
| <b>Table S7</b>  | Similarity matrix of compound data sets computed as the median Tanimoto coefficient between its compounds using ECFP4. S9      |
| <b>Table S8</b>  | Similarity matrix of compound data sets computed as Tanimoto coefficient between its DFP based on ECFP4. S10                   |
| <b>Table S9</b>  | Similarity matrix of compound data sets computed as Tanimoto coefficient between its SB-DFP based on ECFP4. S11                |
| <b>Table S10</b> | Sequence identity matrix of targets computed from Clustal Omega alignments. S12                                                |

**Table S1. Average similarity searching performances for SB-DFP constructed at different confidence levels. <sup>a</sup>**

| Confidence level<br>(p-value)   | ECFP4              |                      | MACCS keys (166-bit) |                      |
|---------------------------------|--------------------|----------------------|----------------------|----------------------|
|                                 | Average RR         | Average AUC          | Average RR           | Average AUC          |
| <b>99% (p&lt;0.01)</b>          | 50.2 (23.8)        | <b>0.926 (0.077)</b> | <b>35.3 (29.1)</b>   | <b>0.897 (0.081)</b> |
| <b>99.9% (p&lt;0.001)</b>       | <b>50.8 (23.1)</b> | 0.924 (0.080)        | 29.4 (31.1)          | 0.886 (0.090)        |
| <b>99.99% (p&lt;0.0001)</b>     | 50.7 (22.9)        | 0.918 (0.083)        | 28.4 (31.5)          | 0.872 (0.095)        |
| <b>99.999% (p&gt;0.00001)</b>   | 49.9 (22.9)        | 0.910 (0.088)        | 28.1 (31.6)          | 0.835 (0.117)        |
| <b>99.9999% (p&gt;0.000001)</b> | 49.1 (22.9)        | 0.904 (0.095)        | 28.0 (31.2)          | 0.775 (0.152)        |

<sup>a</sup> The best performing methods for each metric is shown in bold. Standard deviations are shown in parentheses.

**Table S2. “1” bits count for 15,403,690 compounds taken from ZINC using MACCS keys.<sup>a</sup>**

| Bit | Count   | Bit | Count    |
|-----|---------|-----|----------|
| 1   | 0       | 84  | 2223311  |
| 2   | 0       | 85  | 8756111  |
| 3   | 0       | 86  | 7163984  |
| 4   | 0       | 87  | 4705749  |
| 5   | 0       | 88  | 4850760  |
| 6   | 0       | 89  | 1733047  |
| 7   | 0       | 90  | 6989685  |
| 8   | 68484   | 91  | 7298770  |
| 9   | 0       | 92  | 9776977  |
| 10  | 0       | 93  | 5830136  |
| 11  | 252951  | 94  | 5038471  |
| 12  | 0       | 95  | 7395965  |
| 13  | 2577    | 96  | 9582355  |
| 14  | 1       | 97  | 7148408  |
| 15  | 1139    | 98  | 7818322  |
| 16  | 51      | 99  | 737232   |
| 17  | 120645  | 100 | 10892579 |
| 18  | 0       | 101 | 5066065  |
| 19  | 539512  | 102 | 2305464  |
| 20  | 0       | 103 | 2184371  |
| 21  | 13801   | 104 | 7672347  |
| 22  | 980413  | 105 | 5276043  |
| 23  | 266605  | 106 | 5808622  |
| 24  | 2271    | 107 | 5346980  |
| 25  | 481478  | 108 | 5733218  |
| 26  | 69481   | 109 | 4973082  |
| 27  | 49797   | 110 | 11198117 |
| 28  | 195235  | 111 | 11451517 |
| 29  | 37      | 112 | 4142913  |
| 30  | 8       | 113 | 5543483  |
| 31  | 78      | 114 | 3776147  |
| 32  | 1414636 | 115 | 4968917  |
| 33  | 1458080 | 116 | 5321466  |
| 34  | 229666  | 117 | 11740905 |
| 35  | 0       | 118 | 9753376  |
| 36  | 2645901 | 119 | 298365   |
| 37  | 2075227 | 120 | 9789376  |
| 38  | 3132381 | 121 | 11735266 |
| 39  | 17230   | 122 | 10327864 |
| 40  | 17705   | 123 | 2394576  |
| 41  | 674850  | 124 | 5256885  |
| 42  | 2956810 | 125 | 10178681 |
| 43  | 1106726 | 126 | 5931192  |
| 44  | 0       | 127 | 6368134  |
| 45  | 108153  | 128 | 8543630  |
| 46  | 711023  | 129 | 8937760  |
| 47  | 2397840 | 130 | 2259218  |
| 48  | 17238   | 131 | 5681306  |
| 49  | 4776081 | 132 | 7767731  |
| 50  | 302418  | 133 | 7972604  |
| 51  | 1615902 | 134 | 5348961  |
| 52  | 3172149 | 135 | 6763521  |
| 53  | 1584443 | 136 | 5787409  |
| 54  | 1902517 | 137 | 12882269 |
| 55  | 1604604 | 138 | 8842064  |
| 56  | 5       | 139 | 1764188  |
| 57  | 3927104 | 140 | 2497776  |
| 58  | 1605405 | 141 | 4788569  |
| 59  | 2541833 | 142 | 12912635 |
| 60  | 1659158 | 143 | 6368134  |
| 61  | 1659219 | 144 | 9179678  |
| 62  | 4919105 | 145 | 9677648  |
| 63  | 1       | 146 | 6318016  |
| 64  | 2556961 | 147 | 10077906 |
| 65  | 8340196 | 148 | 10837836 |
| 66  | 2065239 | 149 | 8844114  |
| 67  | 1717565 | 150 | 9598365  |
| 68  | 821     | 151 | 12232870 |
| 69  | 1029978 | 152 | 7554412  |
| 70  | 368744  | 153 | 12732204 |
| 71  | 704219  | 154 | 11833635 |
| 72  | 2389368 | 155 | 12011232 |
| 73  | 1659232 | 156 | 14699565 |
| 74  | 2899042 | 157 | 8868254  |
| 75  | 8190584 | 158 | 14647306 |
| 76  | 326627  | 159 | 10997462 |
| 77  | 6371679 | 160 | 12926448 |
| 78  | 297886  | 161 | 15101534 |
| 79  | 7611630 | 162 | 14444086 |
| 80  | 7637694 | 163 | 14357547 |
| 81  | 4624987 | 164 | 14330953 |
| 82  | 6575993 | 165 | 15312239 |
| 83  | 9046831 | 166 | 0        |

<sup>a</sup>MACCS keys 166-bit





**Table S4. Similarity matrix of compound data sets computed as the median Tanimoto coefficient between its compounds using MACCS keys.<sup>a</sup>**

| Data set       | BRD2  | BRD3  | BRD4  | CREBBP | DNMT1 | EHMT2 | EP300 | HDAC10 | HDAC11 | HDAC1 | HDAC2 | HDAC3 | HDAC4 | HDAC5 | HDAC6 | HDAC7 | HDAC8 | HDAC9 | KAT2B | KDM1A | KDM4C | L3MBTL1 | L3MBTL3 | MAP3K7 | MGEA5 | NCOA1 | NCOA3 | PRMT1 |
|----------------|-------|-------|-------|--------|-------|-------|-------|--------|--------|-------|-------|-------|-------|-------|-------|-------|-------|-------|-------|-------|-------|---------|---------|--------|-------|-------|-------|-------|
| <b>BRD2</b>    | 0.569 | 0.571 | 0.513 | 0.603  | 0.425 | 0.481 | 0.431 | 0.382  | 0.375  | 0.409 | 0.396 | 0.403 | 0.403 | 0.371 | 0.391 | 0.385 | 0.400 | 0.383 | 0.476 | 0.350 | 0.395 | 0.441   | 0.417   | 0.500  | 0.349 | 0.409 | 0.423 | 0.403 |
| <b>BRD3</b>    | 0.571 | 0.574 | 0.514 | 0.603  | 0.427 | 0.481 | 0.435 | 0.385  | 0.377  | 0.412 | 0.397 | 0.405 | 0.405 | 0.374 | 0.393 | 0.386 | 0.404 | 0.385 | 0.478 | 0.352 | 0.397 | 0.443   | 0.418   | 0.500  | 0.350 | 0.410 | 0.424 | 0.405 |
| <b>BRD4</b>    | 0.513 | 0.514 | 0.487 | 0.521  | 0.413 | 0.468 | 0.426 | 0.391  | 0.385  | 0.409 | 0.397 | 0.403 | 0.400 | 0.373 | 0.395 | 0.387 | 0.403 | 0.389 | 0.451 | 0.348 | 0.386 | 0.419   | 0.397   | 0.478  | 0.355 | 0.392 | 0.407 | 0.398 |
| <b>CREBBP</b>  | 0.603 | 0.603 | 0.521 | 0.697  | 0.433 | 0.484 | 0.438 | 0.385  | 0.382  | 0.413 | 0.400 | 0.407 | 0.412 | 0.377 | 0.393 | 0.388 | 0.405 | 0.385 | 0.522 | 0.352 | 0.400 | 0.452   | 0.431   | 0.513  | 0.353 | 0.419 | 0.434 | 0.414 |
| <b>DNMT1</b>   | 0.425 | 0.427 | 0.413 | 0.433  | 0.403 | 0.409 | 0.385 | 0.402  | 0.394  | 0.397 | 0.389 | 0.396 | 0.379 | 0.367 | 0.394 | 0.382 | 0.398 | 0.390 | 0.397 | 0.326 | 0.379 | 0.384   | 0.364   | 0.414  | 0.384 | 0.362 | 0.374 | 0.361 |
| <b>EHMT2</b>   | 0.481 | 0.481 | 0.468 | 0.484  | 0.409 | 0.641 | 0.396 | 0.409  | 0.413  | 0.415 | 0.390 | 0.402 | 0.381 | 0.370 | 0.405 | 0.388 | 0.417 | 0.402 | 0.393 | 0.389 | 0.387 | 0.453   | 0.448   | 0.515  | 0.437 | 0.387 | 0.410 | 0.441 |
| <b>EP300</b>   | 0.431 | 0.435 | 0.426 | 0.438  | 0.385 | 0.396 | 0.427 | 0.345  | 0.342  | 0.364 | 0.348 | 0.355 | 0.356 | 0.333 | 0.357 | 0.344 | 0.362 | 0.352 | 0.412 | 0.296 | 0.359 | 0.354   | 0.338   | 0.411  | 0.349 | 0.350 | 0.363 | 0.347 |
| <b>HDAC10</b>  | 0.382 | 0.385 | 0.391 | 0.385  | 0.402 | 0.409 | 0.345 | 0.514  | 0.506  | 0.468 | 0.468 | 0.487 | 0.439 | 0.468 | 0.487 | 0.484 | 0.500 | 0.500 | 0.358 | 0.363 | 0.385 | 0.421   | 0.400   | 0.414  | 0.355 | 0.354 | 0.368 | 0.405 |
| <b>HDAC11</b>  | 0.375 | 0.377 | 0.385 | 0.382  | 0.394 | 0.413 | 0.342 | 0.506  | 0.500  | 0.459 | 0.459 | 0.478 | 0.427 | 0.458 | 0.474 | 0.475 | 0.488 | 0.488 | 0.352 | 0.361 | 0.382 | 0.414   | 0.391   | 0.402  | 0.356 | 0.353 | 0.366 | 0.395 |
| <b>HDAC1</b>   | 0.409 | 0.412 | 0.409 | 0.413  | 0.397 | 0.415 | 0.364 | 0.468  | 0.459  | 0.453 | 0.447 | 0.458 | 0.424 | 0.441 | 0.455 | 0.456 | 0.464 | 0.464 | 0.378 | 0.356 | 0.379 | 0.422   | 0.397   | 0.425  | 0.345 | 0.364 | 0.373 | 0.390 |
| <b>HDAC2</b>   | 0.396 | 0.397 | 0.397 | 0.400  | 0.389 | 0.390 | 0.348 | 0.468  | 0.459  | 0.447 | 0.447 | 0.458 | 0.421 | 0.443 | 0.449 | 0.458 | 0.462 | 0.464 | 0.366 | 0.353 | 0.375 | 0.394   | 0.372   | 0.405  | 0.333 | 0.360 | 0.367 | 0.365 |
| <b>HDAC3</b>   | 0.403 | 0.405 | 0.403 | 0.407  | 0.396 | 0.402 | 0.355 | 0.487  | 0.478  | 0.458 | 0.458 | 0.474 | 0.435 | 0.457 | 0.468 | 0.474 | 0.480 | 0.482 | 0.372 | 0.354 | 0.382 | 0.393   | 0.372   | 0.413  | 0.347 | 0.365 | 0.372 | 0.373 |
| <b>HDAC4</b>   | 0.403 | 0.405 | 0.400 | 0.412  | 0.379 | 0.381 | 0.356 | 0.439  | 0.427  | 0.424 | 0.421 | 0.435 | 0.429 | 0.414 | 0.433 | 0.433 | 0.436 | 0.369 | 0.329 | 0.357 | 0.393 | 0.370   | 0.404   | 0.333  | 0.343 | 0.353 | 0.359 |       |
| <b>HDAC5</b>   | 0.371 | 0.374 | 0.373 | 0.377  | 0.367 | 0.370 | 0.333 | 0.468  | 0.458  | 0.441 | 0.443 | 0.457 | 0.414 | 0.456 | 0.456 | 0.471 | 0.472 | 0.475 | 0.347 | 0.325 | 0.354 | 0.379   | 0.354   | 0.386  | 0.311 | 0.338 | 0.344 | 0.342 |
| <b>HDAC6</b>   | 0.391 | 0.393 | 0.395 | 0.393  | 0.394 | 0.405 | 0.357 | 0.487  | 0.474  | 0.455 | 0.449 | 0.468 | 0.433 | 0.456 | 0.475 | 0.473 | 0.486 | 0.484 | 0.366 | 0.350 | 0.374 | 0.410   | 0.388   | 0.416  | 0.342 | 0.353 | 0.365 | 0.386 |
| <b>HDAC7</b>   | 0.385 | 0.386 | 0.387 | 0.388  | 0.382 | 0.388 | 0.344 | 0.484  | 0.475  | 0.456 | 0.458 | 0.474 | 0.433 | 0.471 | 0.473 | 0.491 | 0.488 | 0.493 | 0.358 | 0.333 | 0.366 | 0.397   | 0.370   | 0.402  | 0.321 | 0.347 | 0.355 | 0.357 |
| <b>HDAC8</b>   | 0.400 | 0.404 | 0.403 | 0.405  | 0.398 | 0.417 | 0.362 | 0.500  | 0.488  | 0.464 | 0.462 | 0.480 | 0.433 | 0.472 | 0.486 | 0.488 | 0.500 | 0.500 | 0.368 | 0.352 | 0.385 | 0.406   | 0.384   | 0.417  | 0.348 | 0.357 | 0.369 | 0.384 |
| <b>HDAC9</b>   | 0.383 | 0.385 | 0.389 | 0.385  | 0.390 | 0.402 | 0.352 | 0.500  | 0.488  | 0.464 | 0.464 | 0.482 | 0.436 | 0.475 | 0.484 | 0.493 | 0.500 | 0.500 | 0.359 | 0.349 | 0.373 | 0.402   | 0.377   | 0.408  | 0.337 | 0.352 | 0.362 | 0.380 |
| <b>KAT2B</b>   | 0.476 | 0.478 | 0.451 | 0.522  | 0.397 | 0.393 | 0.412 | 0.358  | 0.352  | 0.378 | 0.366 | 0.372 | 0.369 | 0.347 | 0.366 | 0.358 | 0.368 | 0.359 | 0.588 | 0.318 | 0.368 | 0.400   | 0.379   | 0.422  | 0.333 | 0.368 | 0.382 | 0.357 |
| <b>KDM1A</b>   | 0.350 | 0.352 | 0.348 | 0.352  | 0.326 | 0.389 | 0.296 | 0.363  | 0.361  | 0.356 | 0.353 | 0.354 | 0.329 | 0.325 | 0.350 | 0.333 | 0.352 | 0.349 | 0.318 | 0.381 | 0.321 | 0.365   | 0.353   | 0.358  | 0.297 | 0.323 | 0.328 | 0.339 |
| <b>KDM4C</b>   | 0.395 | 0.397 | 0.386 | 0.400  | 0.379 | 0.387 | 0.359 | 0.385  | 0.382  | 0.379 | 0.375 | 0.382 | 0.357 | 0.354 | 0.374 | 0.366 | 0.385 | 0.373 | 0.368 | 0.321 | 0.360 | 0.362   | 0.343   | 0.391  | 0.351 | 0.351 | 0.360 | 0.347 |
| <b>L3MBTL1</b> | 0.441 | 0.443 | 0.419 | 0.452  | 0.384 | 0.453 | 0.354 | 0.421  | 0.414  | 0.422 | 0.394 | 0.393 | 0.393 | 0.379 | 0.410 | 0.397 | 0.406 | 0.402 | 0.400 | 0.365 | 0.362 | 0.804   | 0.761   | 0.500  | 0.296 | 0.349 | 0.375 | 0.422 |
| <b>L3MBTL3</b> | 0.417 | 0.418 | 0.397 | 0.431  | 0.364 | 0.448 | 0.338 | 0.400  | 0.391  | 0.397 | 0.372 | 0.372 | 0.370 | 0.354 | 0.388 | 0.370 | 0.384 | 0.377 | 0.379 | 0.353 | 0.343 | 0.761   | 0.732   | 0.480  | 0.293 | 0.338 | 0.357 | 0.415 |
| <b>MAP3K7</b>  | 0.500 | 0.500 | 0.478 | 0.513  | 0.414 | 0.515 | 0.411 | 0.414  | 0.402  | 0.425 | 0.405 | 0.413 | 0.404 | 0.386 | 0.416 | 0.402 | 0.417 | 0.408 | 0.422 | 0.358 | 0.391 | 0.500   | 0.480   | 0.541  | 0.381 | 0.397 | 0.409 | 0.421 |
| <b>MGEA5</b>   | 0.349 | 0.350 | 0.355 | 0.353  | 0.384 | 0.437 | 0.349 | 0.355  | 0.356  | 0.345 | 0.333 | 0.347 | 0.333 | 0.311 | 0.342 | 0.321 | 0.348 | 0.337 | 0.333 | 0.297 | 0.351 | 0.296   | 0.293   | 0.381  | 0.687 | 0.333 | 0.352 | 0.350 |
| <b>NCOA1</b>   | 0.409 | 0.410 | 0.392 | 0.419  | 0.362 | 0.387 | 0.350 | 0.354  | 0.353  | 0.364 | 0.360 | 0.365 | 0.343 | 0.338 | 0.353 | 0.347 | 0.357 | 0.352 | 0.368 | 0.323 | 0.351 | 0.349   | 0.338   | 0.397  | 0.333 | 0.352 | 0.359 | 0.345 |
| <b>NCOA3</b>   | 0.423 | 0.424 | 0.407 | 0.434  | 0.374 | 0.410 | 0.363 | 0.368  | 0.366  | 0.373 | 0.367 | 0.372 | 0.353 | 0.344 | 0.365 | 0.355 | 0.369 | 0.362 | 0.382 | 0.328 | 0.360 | 0.375   | 0.357   | 0.409  | 0.352 | 0.359 | 0.369 | 0.357 |
| <b>PRMT1</b>   | 0.403 | 0.405 | 0.398 | 0.414  | 0.361 | 0.441 | 0.347 | 0.405  | 0.395  | 0.390 | 0.365 | 0.373 | 0.359 | 0.342 | 0.386 | 0.357 | 0.384 | 0.380 | 0.357 | 0.339 | 0.347 | 0.422   | 0.415   | 0.421  | 0.350 | 0.345 | 0.357 | 0.397 |

<sup>a</sup>MACCS keys 166-bit

**Table S5. Similarity matrix of compound data sets computed as Tanimoto coefficient between its DFP based on MACCS keys. <sup>a</sup>**

| Data set | BRD2  | BRD3  | BRD4  | CREBBP | DNMT1 | EHMT2 | EP300 | HDAC10 | HDAC11 | HDAC1 | HDAC2 | HDAC3 | HDAC4 | HDAC5 | HDAC6 | HDAC7 | HDAC8 | HDAC9 | KAT2B | KDM1A | KDM4C | L3MBTL1 | L3MBTL3 | MAP3K7 | MGEA5 | NCOA1 | NCOA3 | PRMT1 |
|----------|-------|-------|-------|--------|-------|-------|-------|--------|--------|-------|-------|-------|-------|-------|-------|-------|-------|-------|-------|-------|-------|---------|---------|--------|-------|-------|-------|-------|
| BRD2     | 1.000 | 1.000 | 0.852 | 0.981  | 0.585 | 0.533 | 0.559 | 0.392  | 0.384  | 0.444 | 0.375 | 0.397 | 0.439 | 0.333 | 0.365 | 0.315 | 0.392 | 0.356 | 0.678 | 0.313 | 0.567 | 0.475   | 0.475   | 0.600  | 0.329 | 0.526 | 0.586 | 0.403 |
| BRD3     | 1.000 | 1.000 | 0.852 | 0.981  | 0.585 | 0.533 | 0.559 | 0.392  | 0.384  | 0.444 | 0.375 | 0.397 | 0.439 | 0.333 | 0.365 | 0.315 | 0.392 | 0.356 | 0.678 | 0.313 | 0.567 | 0.475   | 0.475   | 0.600  | 0.329 | 0.526 | 0.586 | 0.403 |
| BRD4     | 0.852 | 0.852 | 1.000 | 0.833  | 0.617 | 0.603 | 0.587 | 0.406  | 0.397  | 0.485 | 0.409 | 0.433 | 0.436 | 0.387 | 0.397 | 0.364 | 0.406 | 0.388 | 0.661 | 0.368 | 0.630 | 0.500   | 0.500   | 0.631  | 0.338 | 0.620 | 0.686 | 0.467 |
| CREBBP   | 0.981 | 0.981 | 0.833 | 1.000  | 0.569 | 0.520 | 0.567 | 0.378  | 0.370  | 0.431 | 0.361 | 0.384 | 0.424 | 0.319 | 0.351 | 0.301 | 0.378 | 0.343 | 0.690 | 0.297 | 0.576 | 0.459   | 0.459   | 0.586  | 0.333 | 0.536 | 0.597 | 0.388 |
| DNMT1    | 0.585 | 0.585 | 0.617 | 0.569  | 1.000 | 0.514 | 0.561 | 0.471  | 0.485  | 0.508 | 0.433 | 0.500 | 0.438 | 0.413 | 0.463 | 0.388 | 0.471 | 0.433 | 0.524 | 0.421 | 0.625 | 0.475   | 0.475   | 0.603  | 0.508 | 0.556 | 0.679 | 0.444 |
| EHMT2    | 0.533 | 0.533 | 0.603 | 0.520  | 0.514 | 1.000 | 0.474 | 0.418  | 0.392  | 0.468 | 0.385 | 0.423 | 0.351 | 0.329 | 0.410 | 0.364 | 0.418 | 0.385 | 0.403 | 0.388 | 0.411 | 0.478   | 0.478   | 0.658  | 0.392 | 0.412 | 0.530 | 0.585 |
| EP300    | 0.559 | 0.559 | 0.587 | 0.567  | 0.561 | 0.474 | 1.000 | 0.392  | 0.384  | 0.465 | 0.394 | 0.397 | 0.418 | 0.353 | 0.384 | 0.333 | 0.392 | 0.375 | 0.623 | 0.313 | 0.567 | 0.385   | 0.385   | 0.514  | 0.464 | 0.554 | 0.643 | 0.403 |
| HDAC10   | 0.392 | 0.392 | 0.406 | 0.378  | 0.471 | 0.418 | 0.392 | 1.000  | 0.815  | 0.870 | 0.882 | 0.904 | 0.643 | 0.745 | 0.885 | 0.860 | 0.852 | 0.846 | 0.333 | 0.446 | 0.444 | 0.475   | 0.475   | 0.473  | 0.307 | 0.424 | 0.391 | 0.492 |
| HDAC11   | 0.384 | 0.384 | 0.397 | 0.370  | 0.485 | 0.392 | 0.384 | 0.815  | 1.000  | 0.768 | 0.843 | 0.796 | 0.579 | 0.776 | 0.811 | 0.784 | 0.849 | 0.774 | 0.324 | 0.463 | 0.483 | 0.393   | 0.393   | 0.446  | 0.315 | 0.414 | 0.403 | 0.459 |
| HDAC1    | 0.444 | 0.444 | 0.485 | 0.431  | 0.508 | 0.468 | 0.465 | 0.870  | 0.768  | 1.000 | 0.865 | 0.852 | 0.632 | 0.765 | 0.868 | 0.808 | 0.836 | 0.796 | 0.406 | 0.491 | 0.533 | 0.492   | 0.492   | 0.528  | 0.320 | 0.491 | 0.475 | 0.559 |
| HDAC2    | 0.375 | 0.375 | 0.409 | 0.361  | 0.433 | 0.385 | 0.394 | 0.882  | 0.843  | 0.865 | 1.000 | 0.900 | 0.571 | 0.848 | 0.808 | 0.854 | 0.846 | 0.878 | 0.333 | 0.481 | 0.500 | 0.431   | 0.431   | 0.438  | 0.270 | 0.482 | 0.417 | 0.475 |
| HDAC3    | 0.397 | 0.397 | 0.433 | 0.384  | 0.500 | 0.423 | 0.397 | 0.904  | 0.796  | 0.852 | 0.900 | 1.000 | 0.569 | 0.796 | 0.865 | 0.840 | 0.800 | 0.827 | 0.377 | 0.455 | 0.500 | 0.458   | 0.458   | 0.460  | 0.311 | 0.456 | 0.419 | 0.475 |
| HDAC4    | 0.439 | 0.439 | 0.436 | 0.424  | 0.438 | 0.351 | 0.418 | 0.643  | 0.579  | 0.632 | 0.571 | 0.569 | 1.000 | 0.588 | 0.636 | 0.635 | 0.586 | 0.571 | 0.419 | 0.431 | 0.431 | 0.436   | 0.436   | 0.464  | 0.304 | 0.434 | 0.397 | 0.482 |
| HDAC5    | 0.333 | 0.333 | 0.387 | 0.319  | 0.413 | 0.329 | 0.353 | 0.745  | 0.776  | 0.765 | 0.848 | 0.796 | 0.588 | 1.000 | 0.776 | 0.864 | 0.780 | 0.809 | 0.328 | 0.458 | 0.482 | 0.434   | 0.434   | 0.441  | 0.261 | 0.490 | 0.418 | 0.429 |
| HDAC6    | 0.365 | 0.365 | 0.397 | 0.351  | 0.463 | 0.410 | 0.384 | 0.885  | 0.811  | 0.868 | 0.808 | 0.865 | 0.636 | 0.776 | 1.000 | 0.896 | 0.849 | 0.843 | 0.343 | 0.463 | 0.459 | 0.491   | 0.491   | 0.466  | 0.315 | 0.414 | 0.403 | 0.535 |
| HDAC7    | 0.397 | 0.397 | 0.433 | 0.384  | 0.500 | 0.423 | 0.397 | 0.904  | 0.796  | 0.852 | 0.900 | 1.000 | 0.569 | 0.796 | 0.865 | 0.840 | 0.800 | 0.827 | 0.377 | 0.455 | 0.500 | 0.458   | 0.458   | 0.460  | 0.311 | 0.456 | 0.419 | 0.475 |
| HDAC8    | 0.439 | 0.439 | 0.436 | 0.424  | 0.438 | 0.351 | 0.418 | 0.643  | 0.579  | 0.632 | 0.571 | 0.569 | 1.000 | 0.588 | 0.636 | 0.635 | 0.586 | 0.571 | 0.419 | 0.431 | 0.431 | 0.436   | 0.436   | 0.464  | 0.304 | 0.434 | 0.397 | 0.482 |
| HDAC9    | 0.333 | 0.333 | 0.387 | 0.319  | 0.413 | 0.329 | 0.353 | 0.745  | 0.776  | 0.765 | 0.848 | 0.796 | 0.588 | 1.000 | 0.776 | 0.864 | 0.780 | 0.809 | 0.328 | 0.458 | 0.482 | 0.434   | 0.434   | 0.441  | 0.261 | 0.490 | 0.418 | 0.429 |
| KAT2B    | 0.678 | 0.678 | 0.661 | 0.690  | 0.524 | 0.403 | 0.623 | 0.333  | 0.324  | 0.406 | 0.333 | 0.377 | 0.419 | 0.328 | 0.343 | 0.309 | 0.333 | 0.333 | 1.000 | 0.305 | 0.526 | 0.383   | 0.383   | 0.500  | 0.382 | 0.509 | 0.574 | 0.339 |
| KDM1A    | 0.313 | 0.313 | 0.368 | 0.297  | 0.421 | 0.388 | 0.313 | 0.446  | 0.463  | 0.491 | 0.481 | 0.455 | 0.431 | 0.458 | 0.463 | 0.480 | 0.446 | 0.453 | 0.305 | 1.000 | 0.385 | 0.447   | 0.447   | 0.406  | 0.254 | 0.477 | 0.458 | 0.500 |
| KDM4C    | 0.567 | 0.567 | 0.630 | 0.576  | 0.625 | 0.411 | 0.567 | 0.444  | 0.483  | 0.533 | 0.500 | 0.500 | 0.431 | 0.482 | 0.459 | 0.424 | 0.468 | 0.450 | 0.526 | 0.385 | 1.000 | 0.418   | 0.418   | 0.563  | 0.413 | 0.667 | 0.667 | 0.390 |
| L3MBTL1  | 0.475 | 0.475 | 0.500 | 0.459  | 0.475 | 0.478 | 0.385 | 0.475  | 0.393  | 0.492 | 0.431 | 0.458 | 0.436 | 0.434 | 0.491 | 0.455 | 0.426 | 0.431 | 0.383 | 0.447 | 0.418 | 1.000   | 1.000   | 0.600  | 0.288 | 0.420 | 0.462 | 0.500 |
| L3MBTL3  | 0.475 | 0.475 | 0.500 | 0.459  | 0.475 | 0.478 | 0.385 | 0.475  | 0.393  | 0.492 | 0.431 | 0.458 | 0.436 | 0.434 | 0.491 | 0.455 | 0.426 | 0.431 | 0.383 | 0.447 | 0.418 | 1.000   | 1.000   | 0.600  | 0.288 | 0.420 | 0.462 | 0.500 |
| MAP3K7   | 0.600 | 0.600 | 0.631 | 0.586  | 0.603 | 0.658 | 0.514 | 0.473  | 0.446  | 0.528 | 0.438 | 0.460 | 0.464 | 0.441 | 0.466 | 0.437 | 0.473 | 0.458 | 0.500 | 0.406 | 0.563 | 0.600   | 0.600   | 1.000  | 0.408 | 0.576 | 0.607 | 0.515 |
| MGEA5    | 0.329 | 0.329 | 0.338 | 0.333  | 0.508 | 0.392 | 0.464 | 0.307  | 0.315  | 0.320 | 0.270 | 0.311 | 0.304 | 0.261 | 0.315 | 0.282 | 0.307 | 0.288 | 0.382 | 0.254 | 0.413 | 0.288   | 0.288   | 0.408  | 1.000 | 0.323 | 0.426 | 0.349 |
| NCOA1    | 0.526 | 0.526 | 0.620 | 0.536  | 0.556 | 0.412 | 0.554 | 0.424  | 0.414  | 0.491 | 0.482 | 0.456 | 0.434 | 0.490 | 0.414 | 0.426 | 0.448 | 0.482 | 0.509 | 0.477 | 0.667 | 0.420   | 0.420   | 0.576  | 0.323 | 1.000 | 0.781 | 0.389 |
| NCOA3    | 0.586 | 0.586 | 0.686 | 0.597  | 0.679 | 0.530 | 0.643 | 0.391  | 0.403  | 0.475 | 0.417 | 0.419 | 0.397 | 0.418 | 0.403 | 0.390 | 0.413 | 0.417 | 0.574 | 0.458 | 0.667 | 0.462   | 0.462   | 0.607  | 0.426 | 0.781 | 1.000 | 0.455 |
| PRMT1    | 0.403 | 0.403 | 0.467 | 0.388  | 0.444 | 0.585 | 0.403 | 0.492  | 0.459  | 0.559 | 0.475 | 0.475 | 0.482 | 0.429 | 0.535 | 0.500 | 0.517 | 0.450 | 0.339 | 0.500 | 0.390 | 0.500   | 0.500   | 0.515  | 0.349 | 0.389 | 0.455 | 1.000 |

<sup>a</sup>MACCS keys 166-bit

**Table S6. Similarity matrix of compound data sets computed as Tanimoto coefficient between its SB-DFP based on MACCS keys. <sup>a</sup>**

| Data set | BRD2  | BRD3  | BRD4  | CREBBP | DNMT1 | EHMT2 | EP300 | HDAC10 | HDAC11 | HDAC1 | HDAC2 | HDAC3 | HDAC4 | HDAC5 | HDAC6 | HDAC7 | HDAC8 | HDAC9 | KAT2B | KDM1A | KDM4C | L3MBTL1 | L3MBTL3 | MAP3K7 | MGEA5 | NCOA1 | NCOA3 | PRMT1 |
|----------|-------|-------|-------|--------|-------|-------|-------|--------|--------|-------|-------|-------|-------|-------|-------|-------|-------|-------|-------|-------|-------|---------|---------|--------|-------|-------|-------|-------|
| BRD2     | 1.000 | 0.918 | 0.816 | 0.746  | 0.277 | 0.323 | 0.281 | 0.215  | 0.198  | 0.327 | 0.263 | 0.301 | 0.349 | 0.224 | 0.240 | 0.218 | 0.294 | 0.247 | 0.405 | 0.153 | 0.193 | 0.300   | 0.275   | 0.302  | 0.225 | 0.181 | 0.208 | 0.189 |
| BRD3     | 0.918 | 1.000 | 0.895 | 0.685  | 0.337 | 0.316 | 0.344 | 0.227  | 0.211  | 0.333 | 0.273 | 0.309 | 0.356 | 0.238 | 0.262 | 0.232 | 0.302 | 0.259 | 0.427 | 0.182 | 0.207 | 0.310   | 0.286   | 0.311  | 0.211 | 0.197 | 0.222 | 0.202 |
| BRD4     | 0.816 | 0.895 | 1.000 | 0.592  | 0.343 | 0.309 | 0.366 | 0.206  | 0.190  | 0.340 | 0.253 | 0.302 | 0.348 | 0.213 | 0.243 | 0.207 | 0.281 | 0.235 | 0.369 | 0.186 | 0.225 | 0.256   | 0.262   | 0.303  | 0.228 | 0.203 | 0.228 | 0.194 |
| CREBBP   | 0.746 | 0.685 | 0.592 | 1.000  | 0.217 | 0.293 | 0.191 | 0.143  | 0.150  | 0.242 | 0.184 | 0.238 | 0.253 | 0.169 | 0.167 | 0.182 | 0.214 | 0.179 | 0.424 | 0.095 | 0.143 | 0.299   | 0.269   | 0.338  | 0.211 | 0.133 | 0.169 | 0.154 |
| DNMT1    | 0.277 | 0.337 | 0.343 | 0.217  | 1.000 | 0.168 | 0.457 | 0.350  | 0.300  | 0.421 | 0.369 | 0.349 | 0.337 | 0.333 | 0.425 | 0.364 | 0.390 | 0.358 | 0.293 | 0.148 | 0.370 | 0.138   | 0.128   | 0.244  | 0.333 | 0.212 | 0.313 | 0.244 |
| EHMT2    | 0.323 | 0.316 | 0.309 | 0.293  | 0.168 | 1.000 | 0.217 | 0.159  | 0.167  | 0.202 | 0.160 | 0.196 | 0.129 | 0.079 | 0.217 | 0.050 | 0.214 | 0.090 | 0.205 | 0.160 | 0.119 | 0.348   | 0.338   | 0.295  | 0.256 | 0.088 | 0.139 | 0.200 |
| EP300    | 0.281 | 0.344 | 0.366 | 0.191  | 0.457 | 0.217 | 1.000 | 0.186  | 0.181  | 0.253 | 0.253 | 0.279 | 0.265 | 0.224 | 0.297 | 0.235 | 0.286 | 0.250 | 0.351 | 0.192 | 0.253 | 0.094   | 0.096   | 0.217  | 0.273 | 0.213 | 0.323 | 0.215 |
| HDAC10   | 0.215 | 0.227 | 0.206 | 0.143  | 0.350 | 0.159 | 0.186 | 1.000  | 0.726  | 0.535 | 0.547 | 0.539 | 0.439 | 0.440 | 0.636 | 0.542 | 0.750 | 0.531 | 0.169 | 0.283 | 0.333 | 0.221   | 0.141   | 0.182  | 0.158 | 0.231 | 0.263 | 0.265 |
| HDAC11   | 0.198 | 0.211 | 0.190 | 0.150  | 0.300 | 0.167 | 0.181 | 0.726  | 1.000  | 0.458 | 0.462 | 0.477 | 0.400 | 0.478 | 0.576 | 0.522 | 0.709 | 0.544 | 0.178 | 0.237 | 0.312 | 0.234   | 0.149   | 0.176  | 0.183 | 0.200 | 0.214 | 0.206 |
| HDAC1    | 0.327 | 0.333 | 0.340 | 0.242  | 0.421 | 0.202 | 0.253 | 0.535  | 0.458  | 1.000 | 0.681 | 0.603 | 0.514 | 0.391 | 0.645 | 0.422 | 0.597 | 0.460 | 0.244 | 0.288 | 0.347 | 0.191   | 0.153   | 0.333  | 0.193 | 0.246 | 0.254 | 0.226 |
| HDAC2    | 0.263 | 0.273 | 0.253 | 0.184  | 0.369 | 0.160 | 0.253 | 0.547  | 0.462  | 0.681 | 1.000 | 0.698 | 0.500 | 0.411 | 0.643 | 0.473 | 0.591 | 0.491 | 0.213 | 0.292 | 0.300 | 0.184   | 0.128   | 0.256  | 0.173 | 0.246 | 0.295 | 0.274 |
| HDAC3    | 0.301 | 0.309 | 0.302 | 0.238  | 0.349 | 0.196 | 0.279 | 0.539  | 0.477  | 0.603 | 0.698 | 1.000 | 0.493 | 0.429 | 0.568 | 0.439 | 0.631 | 0.509 | 0.256 | 0.269 | 0.314 | 0.230   | 0.171   | 0.303  | 0.247 | 0.263 | 0.290 | 0.270 |
| HDAC4    | 0.349 | 0.356 | 0.348 | 0.253  | 0.337 | 0.129 | 0.265 | 0.439  | 0.400  | 0.514 | 0.500 | 0.493 | 1.000 | 0.442 | 0.423 | 0.453 | 0.485 | 0.500 | 0.240 | 0.194 | 0.339 | 0.194   | 0.120   | 0.270  | 0.264 | 0.218 | 0.210 | 0.271 |
| HDAC5    | 0.224 | 0.238 | 0.213 | 0.169  | 0.333 | 0.079 | 0.224 | 0.440  | 0.478  | 0.391 | 0.411 | 0.429 | 0.442 | 1.000 | 0.397 | 0.800 | 0.472 | 0.833 | 0.228 | 0.163 | 0.333 | 0.167   | 0.070   | 0.203  | 0.193 | 0.419 | 0.333 | 0.179 |
| HDAC6    | 0.240 | 0.262 | 0.243 | 0.167  | 0.425 | 0.217 | 0.297 | 0.636  | 0.576  | 0.645 | 0.643 | 0.568 | 0.423 | 0.397 | 1.000 | 0.429 | 0.754 | 0.468 | 0.178 | 0.292 | 0.333 | 0.222   | 0.169   | 0.216  | 0.182 | 0.250 | 0.275 | 0.244 |
| HDAC7    | 0.218 | 0.232 | 0.207 | 0.182  | 0.364 | 0.050 | 0.235 | 0.542  | 0.522  | 0.422 | 0.473 | 0.439 | 0.453 | 0.800 | 0.429 | 1.000 | 0.509 | 0.839 | 0.200 | 0.180 | 0.375 | 0.161   | 0.068   | 0.197  | 0.167 | 0.353 | 0.317 | 0.193 |
| HDAC8    | 0.294 | 0.302 | 0.281 | 0.214  | 0.390 | 0.214 | 0.286 | 0.750  | 0.709  | 0.597 | 0.591 | 0.631 | 0.485 | 0.472 | 0.754 | 0.509 | 1.000 | 0.558 | 0.215 | 0.318 | 0.364 | 0.236   | 0.160   | 0.244  | 0.221 | 0.296 | 0.322 | 0.278 |
| HDAC9    | 0.247 | 0.259 | 0.235 | 0.179  | 0.358 | 0.090 | 0.250 | 0.531  | 0.544  | 0.460 | 0.491 | 0.509 | 0.500 | 0.833 | 0.468 | 0.839 | 0.558 | 1.000 | 0.217 | 0.200 | 0.367 | 0.179   | 0.085   | 0.213  | 0.203 | 0.424 | 0.342 | 0.211 |
| KAT2B    | 0.405 | 0.427 | 0.369 | 0.424  | 0.293 | 0.205 | 0.351 | 0.169  | 0.178  | 0.244 | 0.213 | 0.256 | 0.240 | 0.228 | 0.178 | 0.200 | 0.215 | 0.217 | 1.000 | 0.119 | 0.155 | 0.246   | 0.179   | 0.271  | 0.229 | 0.192 | 0.228 | 0.183 |
| KDM1A    | 0.153 | 0.182 | 0.186 | 0.095  | 0.148 | 0.160 | 0.192 | 0.283  | 0.237  | 0.288 | 0.292 | 0.269 | 0.194 | 0.163 | 0.292 | 0.180 | 0.318 | 0.200 | 0.119 | 1.000 | 0.150 | 0.153   | 0.158   | 0.226  | 0.106 | 0.290 | 0.239 | 0.291 |
| KDM4C    | 0.193 | 0.207 | 0.225 | 0.143  | 0.370 | 0.119 | 0.253 | 0.333  | 0.312  | 0.347 | 0.300 | 0.314 | 0.339 | 0.333 | 0.333 | 0.375 | 0.364 | 0.367 | 0.155 | 0.150 | 1.000 | 0.103   | 0.090   | 0.186  | 0.312 | 0.333 | 0.306 | 0.182 |
| L3MBTL1  | 0.300 | 0.310 | 0.256 | 0.299  | 0.138 | 0.348 | 0.094 | 0.221  | 0.234  | 0.191 | 0.184 | 0.230 | 0.194 | 0.167 | 0.222 | 0.161 | 0.236 | 0.179 | 0.246 | 0.153 | 0.103 | 1.000   | 0.800   | 0.323  | 0.162 | 0.100 | 0.086 | 0.262 |
| L3MBTL3  | 0.275 | 0.286 | 0.262 | 0.269  | 0.128 | 0.338 | 0.096 | 0.141  | 0.149  | 0.153 | 0.128 | 0.171 | 0.120 | 0.070 | 0.169 | 0.068 | 0.160 | 0.085 | 0.179 | 0.158 | 0.090 | 0.800   | 1.000   | 0.333  | 0.149 | 0.104 | 0.089 | 0.293 |
| MAP3K7   | 0.302 | 0.311 | 0.303 | 0.338  | 0.244 | 0.295 | 0.217 | 0.182  | 0.176  | 0.333 | 0.256 | 0.303 | 0.270 | 0.203 | 0.216 | 0.197 | 0.244 | 0.213 | 0.271 | 0.226 | 0.186 | 0.323   | 0.333   | 1.000  | 0.261 | 0.235 | 0.224 | 0.250 |
| MGEA5    | 0.225 | 0.211 | 0.228 | 0.211  | 0.333 | 0.256 | 0.273 | 0.158  | 0.183  | 0.193 | 0.173 | 0.247 | 0.264 | 0.193 | 0.182 | 0.167 | 0.221 | 0.203 | 0.229 | 0.106 | 0.312 | 0.162   | 0.149   | 0.261  | 1.000 | 0.132 | 0.214 | 0.188 |
| NCOA1    | 0.181 | 0.197 | 0.203 | 0.133  | 0.212 | 0.088 | 0.213 | 0.231  | 0.200  | 0.246 | 0.246 | 0.263 | 0.218 | 0.419 | 0.250 | 0.353 | 0.296 | 0.424 | 0.192 | 0.290 | 0.333 | 0.100   | 0.104   | 0.235  | 0.132 | 1.000 | 0.517 | 0.184 |
| NCOA3    | 0.208 | 0.222 | 0.228 | 0.169  | 0.313 | 0.139 | 0.323 | 0.263  | 0.214  | 0.254 | 0.295 | 0.290 | 0.210 | 0.333 | 0.275 | 0.317 | 0.322 | 0.342 | 0.228 | 0.239 | 0.306 | 0.086   | 0.089   | 0.224  | 0.214 | 0.517 | 1.000 | 0.222 |
| PRMT1    | 0.189 | 0.202 | 0.194 | 0.154  | 0.244 | 0.200 | 0.215 | 0.265  | 0.206  | 0.226 | 0.274 | 0.270 | 0.271 | 0.179 | 0.244 | 0.193 | 0.278 | 0.211 | 0.183 | 0.291 | 0.182 | 0.262   | 0.293   | 0.250  | 0.188 | 0.184 | 0.222 | 1.000 |

<sup>a</sup>MACCS keys 166-bit



**Table S7. Similarity matrix of compound data sets computed as the median Tanimoto coefficient between its compounds using ECFP4.<sup>a</sup>**

| Data set | BRD2  | BRD3  | BRD4  | CREBBP | DNMT1 | EHMT2 | EP300 | HDAC10 | HDAC11 | HDAC1 | HDAC2 | HDAC3 | HDAC4 | HDAC5 | HDAC6 | HDAC7 | HDAC8 | HDAC9 | KAT2B | KDM1A | KDM4C | L3MBTL1 | L3MBTL3 | MAP3K7 | MGEA5 | NCOA1 | NCOA3 | PRMT1 |
|----------|-------|-------|-------|--------|-------|-------|-------|--------|--------|-------|-------|-------|-------|-------|-------|-------|-------|-------|-------|-------|-------|---------|---------|--------|-------|-------|-------|-------|
| BRD2     | 0.152 | 0.152 | 0.136 | 0.165  | 0.100 | 0.109 | 0.099 | 0.096  | 0.098  | 0.101 | 0.099 | 0.098 | 0.101 | 0.101 | 0.098 | 0.100 | 0.103 | 0.100 | 0.114 | 0.103 | 0.096 | 0.102   | 0.099   | 0.117  | 0.067 | 0.102 | 0.103 | 0.085 |
| BRD3     | 0.152 | 0.153 | 0.137 | 0.165  | 0.100 | 0.110 | 0.099 | 0.096  | 0.099  | 0.101 | 0.099 | 0.098 | 0.101 | 0.101 | 0.098 | 0.100 | 0.103 | 0.100 | 0.114 | 0.104 | 0.096 | 0.103   | 0.100   | 0.117  | 0.067 | 0.102 | 0.103 | 0.085 |
| BRD4     | 0.136 | 0.137 | 0.133 | 0.132  | 0.101 | 0.107 | 0.099 | 0.100  | 0.101  | 0.105 | 0.103 | 0.102 | 0.105 | 0.103 | 0.102 | 0.102 | 0.105 | 0.103 | 0.109 | 0.102 | 0.097 | 0.103   | 0.100   | 0.117  | 0.068 | 0.103 | 0.104 | 0.087 |
| CREBBP   | 0.165 | 0.165 | 0.132 | 0.287  | 0.095 | 0.108 | 0.099 | 0.092  | 0.094  | 0.095 | 0.093 | 0.093 | 0.094 | 0.096 | 0.092 | 0.096 | 0.097 | 0.094 | 0.124 | 0.098 | 0.095 | 0.090   | 0.091   | 0.112  | 0.065 | 0.099 | 0.099 | 0.081 |
| DNMT1    | 0.100 | 0.100 | 0.101 | 0.095  | 0.116 | 0.089 | 0.102 | 0.116  | 0.117  | 0.120 | 0.119 | 0.115 | 0.113 | 0.119 | 0.117 | 0.120 | 0.118 | 0.121 | 0.102 | 0.106 | 0.105 | 0.103   | 0.098   | 0.108  | 0.072 | 0.107 | 0.109 | 0.087 |
| EHMT2    | 0.109 | 0.110 | 0.107 | 0.108  | 0.089 | 0.232 | 0.088 | 0.091  | 0.096  | 0.093 | 0.087 | 0.090 | 0.089 | 0.092 | 0.093 | 0.087 | 0.095 | 0.092 | 0.091 | 0.100 | 0.087 | 0.115   | 0.118   | 0.111  | 0.075 | 0.092 | 0.097 | 0.088 |
| EP300    | 0.099 | 0.099 | 0.099 | 0.099  | 0.102 | 0.088 | 0.108 | 0.099  | 0.101  | 0.104 | 0.102 | 0.100 | 0.100 | 0.103 | 0.101 | 0.102 | 0.102 | 0.102 | 0.108 | 0.097 | 0.099 | 0.087   | 0.088   | 0.103  | 0.068 | 0.100 | 0.102 | 0.083 |
| HDAC10   | 0.096 | 0.096 | 0.100 | 0.092  | 0.116 | 0.091 | 0.099 | 0.167  | 0.159  | 0.148 | 0.147 | 0.148 | 0.133 | 0.153 | 0.152 | 0.161 | 0.155 | 0.162 | 0.098 | 0.112 | 0.111 | 0.111   | 0.105   | 0.105  | 0.070 | 0.107 | 0.108 | 0.096 |
| HDAC11   | 0.098 | 0.099 | 0.101 | 0.094  | 0.117 | 0.096 | 0.101 | 0.159  | 0.157  | 0.144 | 0.144 | 0.143 | 0.132 | 0.150 | 0.147 | 0.157 | 0.150 | 0.158 | 0.099 | 0.115 | 0.113 | 0.115   | 0.111   | 0.105  | 0.068 | 0.109 | 0.110 | 0.095 |
| HDAC1    | 0.101 | 0.101 | 0.105 | 0.095  | 0.120 | 0.093 | 0.104 | 0.148  | 0.144  | 0.149 | 0.148 | 0.145 | 0.134 | 0.147 | 0.147 | 0.151 | 0.147 | 0.154 | 0.103 | 0.115 | 0.112 | 0.113   | 0.108   | 0.111  | 0.069 | 0.113 | 0.114 | 0.098 |
| HDAC2    | 0.099 | 0.099 | 0.103 | 0.093  | 0.119 | 0.087 | 0.102 | 0.147  | 0.144  | 0.148 | 0.149 | 0.146 | 0.136 | 0.147 | 0.147 | 0.152 | 0.148 | 0.153 | 0.101 | 0.115 | 0.110 | 0.115   | 0.108   | 0.110  | 0.068 | 0.112 | 0.113 | 0.094 |
| HDAC3    | 0.098 | 0.098 | 0.102 | 0.093  | 0.115 | 0.090 | 0.100 | 0.148  | 0.143  | 0.145 | 0.146 | 0.147 | 0.134 | 0.145 | 0.146 | 0.151 | 0.147 | 0.153 | 0.102 | 0.111 | 0.108 | 0.111   | 0.105   | 0.109  | 0.070 | 0.110 | 0.111 | 0.093 |
| HDAC4    | 0.101 | 0.101 | 0.105 | 0.094  | 0.113 | 0.089 | 0.100 | 0.133  | 0.132  | 0.134 | 0.136 | 0.134 | 0.135 | 0.131 | 0.135 | 0.133 | 0.138 | 0.095 | 0.110 | 0.106 | 0.124 | 0.116   | 0.110   | 0.110  | 0.078 | 0.110 | 0.110 | 0.094 |
| HDAC5    | 0.101 | 0.101 | 0.103 | 0.096  | 0.119 | 0.092 | 0.103 | 0.153  | 0.150  | 0.147 | 0.147 | 0.145 | 0.131 | 0.154 | 0.148 | 0.158 | 0.152 | 0.159 | 0.105 | 0.117 | 0.113 | 0.114   | 0.109   | 0.107  | 0.067 | 0.114 | 0.114 | 0.095 |
| HDAC6    | 0.098 | 0.098 | 0.102 | 0.092  | 0.117 | 0.093 | 0.101 | 0.152  | 0.147  | 0.147 | 0.147 | 0.146 | 0.135 | 0.148 | 0.149 | 0.153 | 0.150 | 0.156 | 0.101 | 0.114 | 0.111 | 0.114   | 0.108   | 0.106  | 0.071 | 0.111 | 0.112 | 0.096 |
| HDAC7    | 0.100 | 0.100 | 0.102 | 0.096  | 0.120 | 0.087 | 0.102 | 0.161  | 0.157  | 0.151 | 0.152 | 0.151 | 0.135 | 0.158 | 0.153 | 0.165 | 0.158 | 0.167 | 0.101 | 0.116 | 0.113 | 0.111   | 0.107   | 0.104  | 0.068 | 0.113 | 0.113 | 0.096 |
| HDAC8    | 0.103 | 0.103 | 0.105 | 0.097  | 0.118 | 0.095 | 0.102 | 0.155  | 0.150  | 0.147 | 0.148 | 0.147 | 0.133 | 0.152 | 0.150 | 0.158 | 0.153 | 0.159 | 0.100 | 0.116 | 0.110 | 0.115   | 0.110   | 0.108  | 0.067 | 0.110 | 0.111 | 0.095 |
| HDAC9    | 0.100 | 0.100 | 0.103 | 0.094  | 0.121 | 0.092 | 0.102 | 0.162  | 0.158  | 0.154 | 0.153 | 0.138 | 0.159 | 0.159 | 0.156 | 0.167 | 0.159 | 0.169 | 0.101 | 0.115 | 0.114 | 0.114   | 0.108   | 0.106  | 0.067 | 0.114 | 0.114 | 0.098 |
| KAT2B    | 0.114 | 0.114 | 0.109 | 0.124  | 0.102 | 0.091 | 0.108 | 0.098  | 0.099  | 0.103 | 0.101 | 0.102 | 0.095 | 0.105 | 0.101 | 0.101 | 0.100 | 0.101 | 0.181 | 0.091 | 0.101 | 0.091   | 0.091   | 0.100  | 0.062 | 0.103 | 0.105 | 0.082 |
| KDM1A    | 0.103 | 0.104 | 0.102 | 0.098  | 0.106 | 0.100 | 0.097 | 0.112  | 0.115  | 0.115 | 0.115 | 0.111 | 0.110 | 0.117 | 0.114 | 0.116 | 0.116 | 0.115 | 0.091 | 0.143 | 0.101 | 0.111   | 0.107   | 0.103  | 0.075 | 0.106 | 0.105 | 0.088 |
| KDM4C    | 0.096 | 0.096 | 0.097 | 0.095  | 0.105 | 0.087 | 0.099 | 0.111  | 0.113  | 0.112 | 0.110 | 0.108 | 0.106 | 0.113 | 0.111 | 0.113 | 0.110 | 0.114 | 0.101 | 0.101 | 0.101 | 0.101   | 0.094   | 0.100  | 0.065 | 0.101 | 0.103 | 0.083 |
| L3MBTL1  | 0.102 | 0.103 | 0.103 | 0.090  | 0.103 | 0.115 | 0.087 | 0.111  | 0.115  | 0.113 | 0.115 | 0.111 | 0.124 | 0.114 | 0.114 | 0.111 | 0.115 | 0.114 | 0.091 | 0.111 | 0.101 | 0.553   | 0.490   | 0.143  | 0.061 | 0.097 | 0.102 | 0.079 |
| L3MBTL3  | 0.099 | 0.100 | 0.100 | 0.091  | 0.098 | 0.118 | 0.088 | 0.105  | 0.111  | 0.108 | 0.108 | 0.105 | 0.116 | 0.109 | 0.108 | 0.107 | 0.110 | 0.108 | 0.091 | 0.107 | 0.094 | 0.490   | 0.409   | 0.123  | 0.059 | 0.093 | 0.097 | 0.077 |
| MAP3K7   | 0.117 | 0.117 | 0.117 | 0.112  | 0.108 | 0.111 | 0.103 | 0.105  | 0.105  | 0.111 | 0.110 | 0.109 | 0.110 | 0.107 | 0.106 | 0.104 | 0.108 | 0.106 | 0.100 | 0.103 | 0.100 | 0.143   | 0.123   | 0.138  | 0.083 | 0.104 | 0.108 | 0.089 |
| MGEA5    | 0.067 | 0.067 | 0.068 | 0.065  | 0.072 | 0.075 | 0.068 | 0.070  | 0.068  | 0.069 | 0.068 | 0.070 | 0.078 | 0.067 | 0.071 | 0.068 | 0.067 | 0.067 | 0.062 | 0.075 | 0.065 | 0.061   | 0.059   | 0.083  | 0.321 | 0.068 | 0.069 | 0.067 |
| NCOA1    | 0.102 | 0.102 | 0.103 | 0.099  | 0.107 | 0.092 | 0.100 | 0.107  | 0.109  | 0.113 | 0.112 | 0.110 | 0.110 | 0.114 | 0.111 | 0.113 | 0.110 | 0.114 | 0.103 | 0.106 | 0.101 | 0.097   | 0.093   | 0.104  | 0.068 | 0.107 | 0.108 | 0.084 |
| NCOA3    | 0.103 | 0.103 | 0.104 | 0.099  | 0.109 | 0.097 | 0.102 | 0.108  | 0.110  | 0.114 | 0.113 | 0.111 | 0.110 | 0.114 | 0.112 | 0.113 | 0.111 | 0.114 | 0.105 | 0.105 | 0.103 | 0.102   | 0.097   | 0.108  | 0.069 | 0.108 | 0.109 | 0.086 |
| PRMT1    | 0.085 | 0.085 | 0.087 | 0.081  | 0.087 | 0.088 | 0.083 | 0.096  | 0.095  | 0.098 | 0.094 | 0.093 | 0.094 | 0.095 | 0.096 | 0.096 | 0.095 | 0.098 | 0.082 | 0.088 | 0.083 | 0.079   | 0.077   | 0.089  | 0.067 | 0.084 | 0.086 | 0.077 |

<sup>a</sup> ECFP4 2048-bit

**Table S8. Similarity matrix of compound data sets computed as Tanimoto coefficient between its DFP based on ECFP4. <sup>a</sup>**

| Data set | BRD2  | BRD3  | BRD4  | CREBBP | DNMT1 | EHMT2 | EP300 | HDAC10 | HDAC11 | HDAC1 | HDAC2 | HDAC3 | HDAC4 | HDAC5 | HDAC6 | HDAC7 | HDAC8 | HDAC9 | KAT2B | KDM1A | KDM4C | L3MBTL1 | L3MBTL3 | MAP3K7 | MGEA5 | NCOA1 | NCOA3 | PRMT1 |
|----------|-------|-------|-------|--------|-------|-------|-------|--------|--------|-------|-------|-------|-------|-------|-------|-------|-------|-------|-------|-------|-------|---------|---------|--------|-------|-------|-------|-------|
| BRD2     | 1.000 | 0.963 | 0.367 | 0.703  | 0.177 | 0.153 | 0.267 | 0.100  | 0.162  | 0.200 | 0.143 | 0.177 | 0.194 | 0.143 | 0.143 | 0.114 | 0.147 | 0.143 | 0.250 | 0.143 | 0.194 | 0.125   | 0.128   | 0.192  | 0.095 | 0.226 | 0.194 | 0.200 |
| BRD3     | 0.963 | 1.000 | 0.379 | 0.722  | 0.182 | 0.155 | 0.276 | 0.103  | 0.167  | 0.206 | 0.147 | 0.182 | 0.200 | 0.147 | 0.147 | 0.118 | 0.152 | 0.147 | 0.258 | 0.146 | 0.200 | 0.128   | 0.130   | 0.196  | 0.098 | 0.233 | 0.200 | 0.207 |
| BRD4     | 0.367 | 0.379 | 1.000 | 0.282  | 0.350 | 0.196 | 0.471 | 0.192  | 0.304  | 0.381 | 0.286 | 0.350 | 0.412 | 0.286 | 0.286 | 0.238 | 0.300 | 0.286 | 0.421 | 0.250 | 0.412 | 0.206   | 0.212   | 0.290  | 0.138 | 0.471 | 0.333 | 0.438 |
| CREBBP   | 0.703 | 0.722 | 0.282 | 1.000  | 0.140 | 0.149 | 0.205 | 0.082  | 0.130  | 0.159 | 0.114 | 0.140 | 0.150 | 0.114 | 0.114 | 0.091 | 0.116 | 0.114 | 0.225 | 0.140 | 0.150 | 0.105   | 0.107   | 0.164  | 0.078 | 0.175 | 0.150 | 0.154 |
| DNMT1    | 0.177 | 0.182 | 0.350 | 0.140  | 1.000 | 0.125 | 0.500 | 0.429  | 0.526  | 0.647 | 0.529 | 0.625 | 0.643 | 0.625 | 0.625 | 0.563 | 0.667 | 0.625 | 0.300 | 0.478 | 0.643 | 0.177   | 0.182   | 0.263  | 0.185 | 0.714 | 0.643 | 0.467 |
| EHMT2    | 0.153 | 0.155 | 0.196 | 0.149  | 0.125 | 1.000 | 0.156 | 0.115  | 0.140  | 0.143 | 0.102 | 0.125 | 0.133 | 0.102 | 0.125 | 0.082 | 0.104 | 0.125 | 0.102 | 0.127 | 0.133 | 0.133   | 0.136   | 0.188  | 0.091 | 0.130 | 0.109 | 0.163 |
| EP300    | 0.267 | 0.276 | 0.471 | 0.205  | 0.500 | 0.156 | 1.000 | 0.273  | 0.421  | 0.625 | 0.500 | 0.500 | 0.500 | 0.500 | 0.412 | 0.438 | 0.438 | 0.412 | 0.412 | 0.333 | 0.500 | 0.152   | 0.156   | 0.243  | 0.154 | 0.571 | 0.615 | 0.539 |
| HDAC10   | 0.100 | 0.103 | 0.192 | 0.082  | 0.429 | 0.115 | 0.273 | 1.000  | 0.650  | 0.524 | 0.579 | 0.579 | 0.421 | 0.579 | 0.667 | 0.611 | 0.611 | 0.667 | 0.154 | 0.310 | 0.421 | 0.158   | 0.162   | 0.156  | 0.091 | 0.400 | 0.421 | 0.300 |
| HDAC11   | 0.162 | 0.167 | 0.304 | 0.130  | 0.526 | 0.140 | 0.421 | 0.650  | 1.000  | 0.722 | 0.706 | 0.611 | 0.529 | 0.706 | 0.813 | 0.750 | 0.647 | 0.706 | 0.261 | 0.423 | 0.529 | 0.162   | 0.167   | 0.186  | 0.129 | 0.500 | 0.529 | 0.389 |
| HDAC1    | 0.200 | 0.206 | 0.381 | 0.159  | 0.647 | 0.143 | 0.625 | 0.524  | 0.722  | 1.000 | 0.867 | 0.867 | 0.667 | 0.867 | 0.750 | 0.800 | 0.750 | 0.273 | 0.440 | 0.667 | 0.167 | 0.171   | 0.250   | 0.172  | 0.733 | 0.667 | 0.500 |       |
| HDAC2    | 0.143 | 0.147 | 0.286 | 0.114  | 0.529 | 0.102 | 0.500 | 0.579  | 0.706  | 0.867 | 1.000 | 0.857 | 0.643 | 0.857 | 0.733 | 0.923 | 0.786 | 0.733 | 0.182 | 0.417 | 0.643 | 0.177   | 0.182   | 0.200  | 0.143 | 0.600 | 0.643 | 0.467 |
| HDAC3    | 0.177 | 0.182 | 0.350 | 0.140  | 0.625 | 0.125 | 0.500 | 0.579  | 0.611  | 0.867 | 0.857 | 1.000 | 0.643 | 0.857 | 0.733 | 0.786 | 0.923 | 0.857 | 0.238 | 0.360 | 0.643 | 0.177   | 0.182   | 0.231  | 0.143 | 0.714 | 0.643 | 0.467 |
| HDAC4    | 0.194 | 0.200 | 0.412 | 0.150  | 0.643 | 0.133 | 0.500 | 0.421  | 0.529  | 0.667 | 0.643 | 0.643 | 1.000 | 0.533 | 0.643 | 0.571 | 0.571 | 0.533 | 0.278 | 0.409 | 1.000 | 0.194   | 0.200   | 0.216  | 0.208 | 0.750 | 0.818 | 0.727 |
| HDAC5    | 0.143 | 0.147 | 0.286 | 0.114  | 0.625 | 0.102 | 0.500 | 0.579  | 0.706  | 0.867 | 0.857 | 0.857 | 0.533 | 1.000 | 0.733 | 0.923 | 0.923 | 0.857 | 0.238 | 0.417 | 0.533 | 0.177   | 0.182   | 0.200  | 0.103 | 0.600 | 0.533 | 0.375 |
| HDAC6    | 0.143 | 0.147 | 0.286 | 0.114  | 0.625 | 0.125 | 0.412 | 0.667  | 0.813  | 0.750 | 0.733 | 0.733 | 0.643 | 0.733 | 1.000 | 0.786 | 0.786 | 0.857 | 0.238 | 0.417 | 0.643 | 0.177   | 0.182   | 0.200  | 0.143 | 0.600 | 0.643 | 0.467 |
| HDAC7    | 0.114 | 0.118 | 0.238 | 0.091  | 0.563 | 0.082 | 0.438 | 0.611  | 0.750  | 0.800 | 0.923 | 0.786 | 0.571 | 0.923 | 0.786 | 1.000 | 0.846 | 0.786 | 0.191 | 0.435 | 0.571 | 0.182   | 0.188   | 0.175  | 0.107 | 0.533 | 0.571 | 0.400 |
| HDAC8    | 0.147 | 0.152 | 0.300 | 0.116  | 0.667 | 0.104 | 0.438 | 0.611  | 0.647  | 0.800 | 0.786 | 0.923 | 0.571 | 0.923 | 0.786 | 0.846 | 1.000 | 0.923 | 0.250 | 0.375 | 0.571 | 0.182   | 0.188   | 0.205  | 0.107 | 0.643 | 0.571 | 0.400 |
| HDAC9    | 0.143 | 0.147 | 0.286 | 0.114  | 0.625 | 0.125 | 0.412 | 0.667  | 0.706  | 0.750 | 0.733 | 0.857 | 0.533 | 0.857 | 0.857 | 0.786 | 0.923 | 1.000 | 0.238 | 0.360 | 0.533 | 0.177   | 0.182   | 0.200  | 0.103 | 0.600 | 0.533 | 0.375 |
| KAT2B    | 0.250 | 0.258 | 0.421 | 0.225  | 0.300 | 0.102 | 0.412 | 0.154  | 0.261  | 0.273 | 0.182 | 0.238 | 0.278 | 0.238 | 0.238 | 0.191 | 0.250 | 0.238 | 1.000 | 0.172 | 0.278 | 0.143   | 0.147   | 0.171  | 0.103 | 0.333 | 0.278 | 0.294 |
| KDM1A    | 0.143 | 0.146 | 0.250 | 0.140  | 0.478 | 0.127 | 0.333 | 0.310  | 0.423  | 0.440 | 0.417 | 0.360 | 0.409 | 0.417 | 0.417 | 0.435 | 0.375 | 0.360 | 0.172 | 1.000 | 0.409 | 0.200   | 0.205   | 0.217  | 0.143 | 0.391 | 0.409 | 0.304 |
| KDM4C    | 0.194 | 0.200 | 0.412 | 0.150  | 0.643 | 0.133 | 0.500 | 0.421  | 0.529  | 0.667 | 0.643 | 0.643 | 1.000 | 0.533 | 0.643 | 0.571 | 0.571 | 0.533 | 0.278 | 0.409 | 1.000 | 0.194   | 0.200   | 0.216  | 0.208 | 0.750 | 0.818 | 0.727 |
| L3MBTL1  | 0.125 | 0.128 | 0.206 | 0.105  | 0.177 | 0.133 | 0.152 | 0.158  | 0.162  | 0.167 | 0.177 | 0.177 | 0.194 | 0.177 | 0.177 | 0.182 | 0.182 | 0.177 | 0.143 | 0.200 | 0.194 | 1.000   | 0.963   | 0.240  | 0.070 | 0.188 | 0.194 | 0.161 |
| L3MBTL3  | 0.128 | 0.130 | 0.212 | 0.107  | 0.182 | 0.136 | 0.156 | 0.162  | 0.167  | 0.171 | 0.182 | 0.182 | 0.200 | 0.182 | 0.182 | 0.188 | 0.188 | 0.182 | 0.147 | 0.205 | 0.200 | 0.963   | 1.000   | 0.245  | 0.071 | 0.194 | 0.200 | 0.167 |
| MAP3K7   | 0.192 | 0.196 | 0.290 | 0.164  | 0.263 | 0.188 | 0.243 | 0.156  | 0.186  | 0.250 | 0.200 | 0.231 | 0.216 | 0.200 | 0.200 | 0.175 | 0.205 | 0.200 | 0.171 | 0.217 | 0.216 | 0.240   | 0.245   | 1.000  | 0.125 | 0.278 | 0.250 | 0.189 |
| MGEA5    | 0.095 | 0.098 | 0.138 | 0.078  | 0.185 | 0.091 | 0.154 | 0.091  | 0.129  | 0.172 | 0.143 | 0.143 | 0.208 | 0.103 | 0.143 | 0.107 | 0.107 | 0.103 | 0.103 | 0.143 | 0.208 | 0.070   | 0.071   | 0.125  | 1.000 | 0.154 | 0.208 | 0.217 |
| NCOA1    | 0.226 | 0.233 | 0.471 | 0.175  | 0.714 | 0.130 | 0.571 | 0.400  | 0.500  | 0.733 | 0.600 | 0.714 | 0.750 | 0.600 | 0.600 | 0.533 | 0.643 | 0.600 | 0.333 | 0.391 | 0.750 | 0.188   | 0.194   | 0.278  | 0.154 | 1.000 | 0.750 | 0.539 |
| NCOA3    | 0.194 | 0.200 | 0.333 | 0.150  | 0.643 | 0.109 | 0.615 | 0.421  | 0.529  | 0.667 | 0.643 | 0.643 | 0.818 | 0.533 | 0.643 | 0.571 | 0.571 | 0.533 | 0.278 | 0.409 | 0.818 | 0.194   | 0.200   | 0.250  | 0.208 | 0.750 | 1.000 | 0.583 |
| PRMT1    | 0.200 | 0.207 | 0.438 | 0.154  | 0.467 | 0.163 | 0.539 | 0.300  | 0.389  | 0.500 | 0.467 | 0.467 | 0.727 | 0.375 | 0.467 | 0.400 | 0.400 | 0.375 | 0.294 | 0.304 | 0.727 | 0.161   | 0.167   | 0.189  | 0.217 | 0.539 | 0.583 | 1.000 |

<sup>a</sup> ECFP4 2048-bit

**Table S9. Similarity matrix of compound data sets computed as Tanimoto coefficient between its SB-DFP based on ECFP4.<sup>a</sup>**

| Data set | BRD2  | BRD3  | BRD4  | CREBBP | DNMT1 | EHMT2 | EP300 | HDAC10 | HDAC11 | HDAC1 | HDAC2 | HDAC3 | HDAC4 | HDAC5 | HDAC6 | HDAC7 | HDAC8 | HDAC9 | KAT2B | KDM1A | KDM4C | L3MBTL1 | L3MBTL3 | MAP3K7 | MGEA5 | NCOA1 | NCOA3 | PRMT1 |
|----------|-------|-------|-------|--------|-------|-------|-------|--------|--------|-------|-------|-------|-------|-------|-------|-------|-------|-------|-------|-------|-------|---------|---------|--------|-------|-------|-------|-------|
| BRD2     | 1.000 | 0.933 | 0.519 | 0.489  | 0.097 | 0.070 | 0.073 | 0.082  | 0.078  | 0.103 | 0.101 | 0.089 | 0.082 | 0.074 | 0.079 | 0.079 | 0.102 | 0.069 | 0.072 | 0.078 | 0.052 | 0.036   | 0.040   | 0.106  | 0.041 | 0.026 | 0.051 | 0.088 |
| BRD3     | 0.933 | 1.000 | 0.537 | 0.475  | 0.101 | 0.070 | 0.075 | 0.089  | 0.082  | 0.106 | 0.105 | 0.093 | 0.084 | 0.080 | 0.082 | 0.086 | 0.107 | 0.074 | 0.075 | 0.077 | 0.049 | 0.040   | 0.040   | 0.102  | 0.044 | 0.028 | 0.048 | 0.088 |
| BRD4     | 0.519 | 0.537 | 1.000 | 0.378  | 0.116 | 0.087 | 0.098 | 0.098  | 0.085  | 0.146 | 0.130 | 0.124 | 0.107 | 0.085 | 0.118 | 0.093 | 0.132 | 0.090 | 0.061 | 0.092 | 0.058 | 0.037   | 0.037   | 0.125  | 0.048 | 0.050 | 0.073 | 0.094 |
| CREBBP   | 0.489 | 0.475 | 0.378 | 1.000  | 0.066 | 0.060 | 0.098 | 0.078  | 0.081  | 0.093 | 0.085 | 0.093 | 0.072 | 0.068 | 0.071 | 0.073 | 0.072 | 0.062 | 0.118 | 0.055 | 0.039 | 0.026   | 0.035   | 0.081  | 0.044 | 0.050 | 0.064 | 0.065 |
| DNMT1    | 0.097 | 0.101 | 0.116 | 0.066  | 1.000 | 0.072 | 0.165 | 0.131  | 0.114  | 0.156 | 0.130 | 0.127 | 0.126 | 0.112 | 0.150 | 0.109 | 0.171 | 0.114 | 0.064 | 0.092 | 0.140 | 0.047   | 0.052   | 0.106  | 0.068 | 0.138 | 0.179 | 0.145 |
| EHMT2    | 0.070 | 0.070 | 0.087 | 0.060  | 0.072 | 1.000 | 0.092 | 0.045  | 0.056  | 0.094 | 0.070 | 0.074 | 0.072 | 0.046 | 0.076 | 0.071 | 0.078 | 0.059 | 0.047 | 0.073 | 0.048 | 0.072   | 0.101   | 0.112  | 0.081 | 0.049 | 0.067 | 0.106 |
| EP300    | 0.073 | 0.075 | 0.098 | 0.098  | 0.165 | 0.092 | 1.000 | 0.092  | 0.089  | 0.130 | 0.115 | 0.111 | 0.092 | 0.075 | 0.122 | 0.076 | 0.125 | 0.070 | 0.136 | 0.152 | 0.099 | 0.024   | 0.034   | 0.097  | 0.079 | 0.092 | 0.114 | 0.134 |
| HDAC10   | 0.082 | 0.089 | 0.098 | 0.078  | 0.131 | 0.045 | 0.092 | 1.000  | 0.591  | 0.329 | 0.458 | 0.444 | 0.268 | 0.269 | 0.342 | 0.332 | 0.365 | 0.294 | 0.069 | 0.112 | 0.097 | 0.038   | 0.044   | 0.072  | 0.034 | 0.058 | 0.095 | 0.104 |
| HDAC11   | 0.078 | 0.082 | 0.085 | 0.081  | 0.114 | 0.056 | 0.089 | 0.591  | 1.000  | 0.271 | 0.399 | 0.348 | 0.249 | 0.311 | 0.291 | 0.340 | 0.343 | 0.305 | 0.072 | 0.104 | 0.084 | 0.029   | 0.051   | 0.061  | 0.035 | 0.053 | 0.094 | 0.088 |
| HDAC1    | 0.103 | 0.106 | 0.146 | 0.093  | 0.156 | 0.094 | 0.130 | 0.329  | 0.271  | 1.000 | 0.468 | 0.442 | 0.273 | 0.195 | 0.496 | 0.228 | 0.433 | 0.246 | 0.066 | 0.131 | 0.129 | 0.030   | 0.045   | 0.104  | 0.052 | 0.084 | 0.139 | 0.128 |
| HDAC2    | 0.101 | 0.105 | 0.130 | 0.085  | 0.130 | 0.070 | 0.115 | 0.458  | 0.399  | 0.468 | 1.000 | 0.562 | 0.281 | 0.249 | 0.363 | 0.281 | 0.393 | 0.280 | 0.074 | 0.122 | 0.125 | 0.026   | 0.032   | 0.089  | 0.038 | 0.061 | 0.126 | 0.108 |
| HDAC3    | 0.089 | 0.093 | 0.124 | 0.093  | 0.127 | 0.074 | 0.111 | 0.444  | 0.348  | 0.442 | 0.562 | 1.000 | 0.296 | 0.206 | 0.420 | 0.240 | 0.346 | 0.258 | 0.071 | 0.109 | 0.105 | 0.030   | 0.028   | 0.090  | 0.043 | 0.075 | 0.120 | 0.116 |
| HDAC4    | 0.082 | 0.084 | 0.107 | 0.072  | 0.126 | 0.072 | 0.092 | 0.268  | 0.249  | 0.273 | 0.281 | 0.296 | 1.000 | 0.218 | 0.318 | 0.275 | 0.252 | 0.273 | 0.045 | 0.094 | 0.089 | 0.045   | 0.044   | 0.076  | 0.042 | 0.053 | 0.067 | 0.109 |
| HDAC5    | 0.074 | 0.080 | 0.085 | 0.068  | 0.112 | 0.046 | 0.075 | 0.269  | 0.311  | 0.195 | 0.249 | 0.206 | 0.218 | 1.000 | 0.194 | 0.567 | 0.229 | 0.488 | 0.050 | 0.114 | 0.099 | 0.027   | 0.044   | 0.061  | 0.017 | 0.055 | 0.100 | 0.110 |
| HDAC6    | 0.079 | 0.082 | 0.118 | 0.071  | 0.150 | 0.076 | 0.122 | 0.342  | 0.291  | 0.496 | 0.363 | 0.420 | 0.318 | 0.194 | 1.000 | 0.229 | 0.470 | 0.258 | 0.062 | 0.135 | 0.124 | 0.033   | 0.048   | 0.082  | 0.044 | 0.079 | 0.117 | 0.135 |
| HDAC7    | 0.079 | 0.086 | 0.093 | 0.073  | 0.109 | 0.071 | 0.076 | 0.332  | 0.340  | 0.228 | 0.281 | 0.240 | 0.275 | 0.567 | 0.229 | 1.000 | 0.250 | 0.483 | 0.061 | 0.104 | 0.082 | 0.029   | 0.045   | 0.046  | 0.029 | 0.055 | 0.084 | 0.098 |
| HDAC8    | 0.102 | 0.107 | 0.132 | 0.072  | 0.171 | 0.078 | 0.125 | 0.365  | 0.343  | 0.433 | 0.393 | 0.346 | 0.252 | 0.229 | 0.470 | 0.250 | 1.000 | 0.278 | 0.057 | 0.133 | 0.114 | 0.030   | 0.057   | 0.101  | 0.036 | 0.077 | 0.112 | 0.138 |
| HDAC9    | 0.069 | 0.074 | 0.090 | 0.062  | 0.114 | 0.059 | 0.070 | 0.294  | 0.305  | 0.246 | 0.280 | 0.258 | 0.273 | 0.488 | 0.258 | 0.483 | 0.278 | 1.000 | 0.074 | 0.103 | 0.098 | 0.038   | 0.046   | 0.064  | 0.026 | 0.049 | 0.102 | 0.111 |
| KAT2B    | 0.072 | 0.075 | 0.061 | 0.118  | 0.064 | 0.047 | 0.136 | 0.069  | 0.072  | 0.066 | 0.074 | 0.071 | 0.045 | 0.050 | 0.062 | 0.061 | 0.057 | 0.074 | 1.000 | 0.033 | 0.071 | 0.027   | 0.023   | 0.040  | 0.023 | 0.060 | 0.082 | 0.053 |
| KDM1A    | 0.078 | 0.077 | 0.092 | 0.055  | 0.092 | 0.073 | 0.152 | 0.112  | 0.104  | 0.131 | 0.122 | 0.109 | 0.094 | 0.114 | 0.135 | 0.104 | 0.133 | 0.103 | 0.033 | 1.000 | 0.113 | 0.026   | 0.028   | 0.074  | 0.040 | 0.051 | 0.095 | 0.158 |
| KDM4C    | 0.052 | 0.049 | 0.058 | 0.039  | 0.140 | 0.048 | 0.099 | 0.097  | 0.084  | 0.129 | 0.125 | 0.105 | 0.089 | 0.099 | 0.124 | 0.082 | 0.114 | 0.098 | 0.071 | 0.113 | 1.000 | 0.034   | 0.026   | 0.058  | 0.033 | 0.124 | 0.129 | 0.079 |
| L3MBTL1  | 0.036 | 0.040 | 0.037 | 0.026  | 0.047 | 0.072 | 0.024 | 0.038  | 0.029  | 0.030 | 0.026 | 0.030 | 0.045 | 0.027 | 0.033 | 0.029 | 0.030 | 0.038 | 0.027 | 0.026 | 0.034 | 1.000   | 0.511   | 0.084  | 0.023 | 0.011 | 0.018 | 0.024 |
| L3MBTL3  | 0.040 | 0.040 | 0.037 | 0.035  | 0.052 | 0.101 | 0.034 | 0.044  | 0.051  | 0.045 | 0.032 | 0.028 | 0.044 | 0.044 | 0.048 | 0.045 | 0.057 | 0.046 | 0.023 | 0.028 | 0.026 | 0.511   | 1.000   | 0.088  | 0.030 | 0.014 | 0.029 | 0.049 |
| MAP3K7   | 0.106 | 0.102 | 0.125 | 0.081  | 0.106 | 0.112 | 0.097 | 0.072  | 0.061  | 0.104 | 0.089 | 0.090 | 0.076 | 0.061 | 0.082 | 0.046 | 0.101 | 0.064 | 0.040 | 0.074 | 0.058 | 0.084   | 0.088   | 1.000  | 0.060 | 0.056 | 0.106 | 0.078 |
| MGEA5    | 0.041 | 0.044 | 0.048 | 0.044  | 0.068 | 0.081 | 0.079 | 0.034  | 0.035  | 0.052 | 0.038 | 0.043 | 0.042 | 0.017 | 0.044 | 0.029 | 0.036 | 0.026 | 0.023 | 0.040 | 0.033 | 0.023   | 0.030   | 0.060  | 1.000 | 0.045 | 0.066 | 0.074 |
| NCOA1    | 0.026 | 0.028 | 0.050 | 0.050  | 0.138 | 0.049 | 0.092 | 0.058  | 0.053  | 0.084 | 0.061 | 0.075 | 0.053 | 0.055 | 0.079 | 0.055 | 0.077 | 0.049 | 0.060 | 0.051 | 0.124 | 0.011   | 0.014   | 0.056  | 0.045 | 1.000 | 0.393 | 0.063 |
| NCOA3    | 0.051 | 0.048 | 0.073 | 0.064  | 0.179 | 0.067 | 0.114 | 0.095  | 0.094  | 0.139 | 0.126 | 0.120 | 0.067 | 0.100 | 0.117 | 0.084 | 0.112 | 0.102 | 0.082 | 0.095 | 0.129 | 0.018   | 0.029   | 0.106  | 0.066 | 0.393 | 1.000 | 0.083 |
| PRMT1    | 0.088 | 0.088 | 0.094 | 0.065  | 0.145 | 0.106 | 0.134 | 0.104  | 0.088  | 0.128 | 0.108 | 0.116 | 0.109 | 0.110 | 0.135 | 0.098 | 0.138 | 0.111 | 0.053 | 0.158 | 0.079 | 0.024   | 0.049   | 0.078  | 0.074 | 0.063 | 0.083 | 1.000 |

<sup>a</sup> ECFP4 2048-bit

**Table S10. Sequence identity matrix of targets computed from Clustal Omega alignments.**

| Data set | BRD2  | BRD3  | BRD4  | CREBBP | DNMT1 | EHMT2 | EP300 | HDAC10 | HDAC11 | HDAC1 | HDAC2 | HDAC3 | HDAC4 | HDAC5 | HDAC6 | HDAC7 | HDAC8 | HDAC9 | KAT2B | KDM1A | KDM4C | L3MBTL1 | L3MBTL3 | MAP3K7 | MGEA5 | NCOA1 | NCOA3 | PRMT1 |
|----------|-------|-------|-------|--------|-------|-------|-------|--------|--------|-------|-------|-------|-------|-------|-------|-------|-------|-------|-------|-------|-------|---------|---------|--------|-------|-------|-------|-------|
| BRD2     | 1.000 | 0.653 | 0.585 | 0.230  | 0.134 | 0.114 | 0.226 | 0.081  | 0.088  | 0.092 | 0.075 | 0.089 | 0.100 | 0.121 | 0.077 | 0.100 | 0.087 | 0.111 | 0.107 | 0.093 | 0.148 | 0.111   | 0.097   | 0.150  | 0.094 | 0.131 | 0.136 | 0.098 |
| BRD3     | 0.653 | 1.000 | 0.602 | 0.242  | 0.136 | 0.098 | 0.216 | 0.054  | 0.110  | 0.097 | 0.047 | 0.089 | 0.063 | 0.087 | 0.082 | 0.100 | 0.100 | 0.075 | 0.112 | 0.090 | 0.140 | 0.119   | 0.122   | 0.180  | 0.100 | 0.152 | 0.116 | 0.054 |
| BRD4     | 0.585 | 0.602 | 1.000 | 0.238  | 0.118 | 0.079 | 0.217 | 0.062  | 0.105  | 0.098 | 0.061 | 0.119 | 0.077 | 0.107 | 0.099 | 0.101 | 0.104 | 0.087 | 0.095 | 0.082 | 0.133 | 0.115   | 0.111   | 0.153  | 0.093 | 0.136 | 0.124 | 0.077 |
| CREBBP   | 0.230 | 0.242 | 0.238 | 1.000  | 0.140 | 0.134 | 0.637 | 0.097  | 0.095  | 0.078 | 0.093 | 0.083 | 0.147 | 0.160 | 0.108 | 0.120 | 0.099 | 0.161 | 0.125 | 0.115 | 0.176 | 0.143   | 0.118   | 0.182  | 0.102 | 0.167 | 0.180 | 0.078 |
| DNMT1    | 0.134 | 0.136 | 0.118 | 0.140  | 1.000 | 0.160 | 0.133 | 0.152  | 0.124  | 0.118 | 0.140 | 0.150 | 0.146 | 0.151 | 0.138 | 0.138 | 0.134 | 0.150 | 0.153 | 0.145 | 0.123 | 0.158   | 0.153   | 0.128  | 0.141 | 0.168 | 0.140 | 0.197 |
| EHMT2    | 0.114 | 0.098 | 0.079 | 0.134  | 0.160 | 1.000 | 0.135 | 0.156  | 0.132  | 0.125 | 0.151 | 0.127 | 0.192 | 0.192 | 0.169 | 0.175 | 0.132 | 0.187 | 0.151 | 0.180 | 0.122 | 0.180   | 0.144   | 0.077  | 0.198 | 0.138 | 0.141 | 0.107 |
| EP300    | 0.226 | 0.216 | 0.217 | 0.637  | 0.133 | 0.135 | 1.000 | 0.104  | 0.108  | 0.078 | 0.089 | 0.076 | 0.155 | 0.167 | 0.117 | 0.131 | 0.090 | 0.161 | 0.102 | 0.128 | 0.188 | 0.139   | 0.119   | 0.176  | 0.120 | 0.164 | 0.148 | 0.079 |
| HDAC10   | 0.081 | 0.054 | 0.062 | 0.097  | 0.152 | 0.156 | 0.104 | 1.000  | 0.202  | 0.247 | 0.851 | 0.591 | 0.240 | 0.235 | 0.231 | 0.223 | 0.405 | 0.249 | 0.106 | 0.156 | 0.099 | 0.113   | 0.116   | 0.067  | 0.175 | 0.130 | 0.124 | 0.140 |
| HDAC11   | 0.088 | 0.110 | 0.105 | 0.095  | 0.124 | 0.132 | 0.108 | 0.202  | 1.000  | 0.240 | 0.187 | 0.179 | 0.376 | 0.353 | 0.416 | 0.375 | 0.198 | 0.393 | 0.116 | 0.132 | 0.106 | 0.141   | 0.110   | 0.135  | 0.137 | 0.174 | 0.124 | 0.115 |
| HDAC1    | 0.092 | 0.097 | 0.098 | 0.078  | 0.118 | 0.125 | 0.078 | 0.247  | 0.240  | 1.000 | 0.246 | 0.228 | 0.230 | 0.224 | 0.262 | 0.224 | 0.231 | 0.227 | 0.123 | 0.133 | 0.097 | 0.114   | 0.119   | 0.105  | 0.126 | 0.124 | 0.109 | 0.112 |
| HDAC2    | 0.075 | 0.047 | 0.061 | 0.093  | 0.140 | 0.151 | 0.089 | 0.851  | 0.187  | 0.246 | 1.000 | 0.591 | 0.225 | 0.236 | 0.237 | 0.208 | 0.407 | 0.252 | 0.117 | 0.156 | 0.102 | 0.112   | 0.120   | 0.067  | 0.150 | 0.126 | 0.123 | 0.127 |
| HDAC3    | 0.089 | 0.089 | 0.119 | 0.083  | 0.150 | 0.127 | 0.076 | 0.591  | 0.179  | 0.228 | 0.591 | 1.000 | 0.229 | 0.239 | 0.214 | 0.208 | 0.410 | 0.234 | 0.134 | 0.181 | 0.081 | 0.136   | 0.114   | 0.062  | 0.133 | 0.123 | 0.112 | 0.179 |
| HDAC4    | 0.100 | 0.063 | 0.077 | 0.147  | 0.146 | 0.192 | 0.155 | 0.240  | 0.376  | 0.230 | 0.225 | 0.229 | 1.000 | 0.616 | 0.353 | 0.534 | 0.224 | 0.597 | 0.146 | 0.210 | 0.136 | 0.096   | 0.112   | 0.153  | 0.156 | 0.108 | 0.103 | 0.103 |
| HDAC5    | 0.121 | 0.087 | 0.107 | 0.160  | 0.151 | 0.192 | 0.167 | 0.235  | 0.353  | 0.224 | 0.236 | 0.239 | 0.616 | 1.000 | 0.342 | 0.483 | 0.218 | 0.611 | 0.121 | 0.198 | 0.136 | 0.138   | 0.113   | 0.103  | 0.148 | 0.137 | 0.109 | 0.108 |
| HDAC6    | 0.077 | 0.082 | 0.099 | 0.108  | 0.138 | 0.169 | 0.117 | 0.231  | 0.416  | 0.262 | 0.237 | 0.214 | 0.353 | 0.342 | 1.000 | 0.335 | 0.220 | 0.352 | 0.130 | 0.171 | 0.130 | 0.140   | 0.103   | 0.121  | 0.138 | 0.163 | 0.141 | 0.109 |
| HDAC7    | 0.100 | 0.100 | 0.101 | 0.120  | 0.138 | 0.175 | 0.131 | 0.223  | 0.375  | 0.224 | 0.208 | 0.208 | 0.534 | 0.483 | 0.335 | 1.000 | 0.212 | 0.482 | 0.145 | 0.186 | 0.141 | 0.132   | 0.112   | 0.129  | 0.160 | 0.149 | 0.104 | 0.115 |
| HDAC8    | 0.087 | 0.100 | 0.104 | 0.099  | 0.134 | 0.132 | 0.090 | 0.405  | 0.198  | 0.231 | 0.407 | 0.410 | 0.224 | 0.218 | 0.220 | 0.212 | 1.000 | 0.229 | 0.114 | 0.171 | 0.096 | 0.142   | 0.137   | 0.113  | 0.145 | 0.131 | 0.115 | 0.108 |
| HDAC9    | 0.111 | 0.075 | 0.087 | 0.161  | 0.150 | 0.187 | 0.161 | 0.249  | 0.393  | 0.227 | 0.252 | 0.234 | 0.597 | 0.611 | 0.352 | 0.482 | 0.229 | 1.000 | 0.146 | 0.197 | 0.134 | 0.145   | 0.102   | 0.120  | 0.149 | 0.148 | 0.117 | 0.137 |
| KAT2B    | 0.107 | 0.112 | 0.095 | 0.125  | 0.153 | 0.151 | 0.102 | 0.106  | 0.116  | 0.123 | 0.117 | 0.134 | 0.146 | 0.121 | 0.130 | 0.145 | 0.114 | 0.146 | 1.000 | 0.145 | 0.084 | 0.133   | 0.156   | 0.146  | 0.134 | 0.164 | 0.154 | 0.135 |
| KDM1A    | 0.093 | 0.090 | 0.082 | 0.115  | 0.145 | 0.180 | 0.128 | 0.156  | 0.132  | 0.133 | 0.156 | 0.181 | 0.210 | 0.198 | 0.171 | 0.186 | 0.171 | 0.197 | 0.145 | 1.000 | 0.083 | 0.118   | 0.117   | 0.111  | 0.114 | 0.138 | 0.126 | 0.116 |
| KDM4C    | 0.148 | 0.140 | 0.133 | 0.176  | 0.123 | 0.122 | 0.188 | 0.099  | 0.106  | 0.097 | 0.102 | 0.081 | 0.136 | 0.136 | 0.130 | 0.141 | 0.096 | 0.134 | 0.084 | 0.083 | 1.000 | 0.132   | 0.133   | 0.154  | 0.112 | 0.134 | 0.122 | 0.084 |
| L3MBTL1  | 0.111 | 0.119 | 0.115 | 0.143  | 0.158 | 0.180 | 0.139 | 0.113  | 0.141  | 0.114 | 0.112 | 0.136 | 0.152 | 0.138 | 0.140 | 0.132 | 0.142 | 0.145 | 0.133 | 0.118 | 0.132 | 1.000   | 0.442   | 0.135  | 0.120 | 0.141 | 0.133 | 0.106 |
| L3MBTL3  | 0.097 | 0.122 | 0.111 | 0.118  | 0.153 | 0.144 | 0.119 | 0.116  | 0.110  | 0.119 | 0.120 | 0.114 | 0.096 | 0.113 | 0.103 | 0.112 | 0.137 | 0.102 | 0.156 | 0.117 | 0.133 | 0.442   | 1.000   | 0.144  | 0.125 | 0.179 | 0.145 | 0.093 |
| MAP3K7   | 0.150 | 0.180 | 0.153 | 0.182  | 0.128 | 0.077 | 0.176 | 0.067  | 0.135  | 0.105 | 0.067 | 0.062 | 0.112 | 0.103 | 0.121 | 0.129 | 0.113 | 0.120 | 0.146 | 0.111 | 0.154 | 0.135   | 0.144   | 1.000  | 0.072 | 0.133 | 0.119 | 0.068 |
| MGEA5    | 0.094 | 0.100 | 0.093 | 0.102  | 0.141 | 0.198 | 0.120 | 0.175  | 0.137  | 0.126 | 0.150 | 0.133 | 0.153 | 0.148 | 0.138 | 0.160 | 0.145 | 0.149 | 0.134 | 0.114 | 0.112 | 0.120   | 0.125   | 0.072  | 1.000 | 0.148 | 0.140 | 0.063 |
| NCOA1    | 0.131 | 0.152 | 0.136 | 0.167  | 0.168 | 0.138 | 0.164 | 0.130  | 0.174  | 0.124 | 0.126 | 0.123 | 0.156 | 0.137 | 0.163 | 0.149 | 0.131 | 0.148 | 0.164 | 0.138 | 0.134 | 0.141   | 0.179   | 0.133  | 0.148 | 1.000 | 0.391 | 0.141 |
| NCOA3    | 0.136 | 0.116 | 0.124 | 0.180  | 0.140 | 0.141 | 0.148 | 0.124  | 0.124  | 0.109 | 0.123 | 0.112 | 0.108 | 0.109 | 0.141 | 0.104 | 0.115 | 0.117 | 0.154 | 0.126 | 0.122 | 0.133   | 0.145   | 0.119  | 0.140 | 0.391 | 1.000 | 0.110 |
| PRMT1    | 0.098 | 0.054 | 0.077 | 0.078  | 0.197 | 0.107 | 0.079 | 0.140  | 0.115  | 0.112 | 0.127 | 0.179 | 0.103 | 0.108 | 0.109 | 0.115 | 0.108 | 0.137 | 0.135 | 0.116 | 0.084 | 0.106   | 0.093   | 0.068  | 0.063 | 0.141 | 0.110 | 1.000 |
